# Supplementary material
Source: publisher figshare collection journal article supplement (https://acs.figshare.com/ndownloader/files/5178070)
Supplement: Supplementary file 1 [file 5178070]

## Supporting Information.

**Quadratic.** A model of the reaction between analyte (G) and recognition moiety (H), which has one set of binding sites, is as follows:

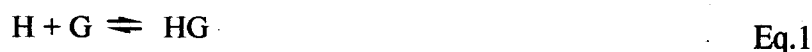

The binding constants for this process can be expressed as a ratio of product over substrates:

$$K_{HG} = \frac{[HG]}{[H][G]} \quad \text{Eq.2}$$

The absorbance in this process is define by Beer's Law (Eq. 3), where  $\epsilon_{HG}$  and  $\epsilon_H$  are molar absorptivity of host-guest complex and host respectively,  $b$  is path length of light through the sample and  $[HG]$  and  $[H]$  are the concentrations of host:guest complex and host respectively.

$$A = \epsilon_{HG}b[HG] + \epsilon_Hb[H] \quad \text{Eq.3}$$

The mass balances for this process are

$$[H]_T = [HG] + [H] \quad \text{Eq.4}$$

$$[G]_T = [HG] + [G] \quad \text{Eq.5}$$

It is desired that binding isotherms for every process which is based on this assumption are drawn we need to know how to calculate the host:guest  $[HG]$  and guest  $[G]$  concentration. First, we have to multiply both sides of Eq.2 by  $[H][G]$  to give:

$$K_{HG}[H][G] = [HG] \quad \text{Eq.6}$$

Solving both Eq.4 for  $[H]$ , and Eq.5 for  $[G]$  and substituting into Eq.6 gives the following expression, Eq.7.

$$K_{HG}([H]_T - [HG])([G]_T - [G]) = [HG] \quad \text{Eq.7}$$

Expanding the terms to the left of the equation, yields Eq.8.

$$K_{HG}[H]_T[G]_T - K_{HG}[HG][H]_T - K_{HG}[HG][G]_T + K_{HG}[HG]^2 = [HG] \quad \text{Eq.8}$$

Setting the equation equal to zero and combining the linear terms now provides the quadratic function below:

$$K_{HG}[HG]^2 - [HG](K_{HG}[H]_T + K_{HG}[G]_T + 1) + K_{HG}[H]_T[G]_T = 0. \quad \text{Eq.9}$$

Solving the quadratic equation gives two possible values for  $[HG]$ :

$$[HG]_1 = \frac{+(K_{HG}[H]_T + K_{HG}[G]_T + 1) + \sqrt{-(K_{HG}[H]_T + K_{HG}[G]_T + 1)^2 - 4K_{HG}^2[H]_T[G]_T}}{2K_{HG}}$$

$$[HG]_2 = \frac{+(K_{HG}[H]_T + K_{HG}[G]_T + 1) - \sqrt{-(K_{HG}[H]_T + K_{HG}[G]_T + 1)^2 - 4K_{HG}^2[H]_T[G]_T}}{2K_{HG}}$$

Substituting these values into equation 4 enables us to calculate the host concentration. Based on these calculations ([HG] and [H]) we are able to simulate the binding isotherm plot for the host-guest binding process.

**Cubic.** A model of the indicator displacement reaction is as follows:

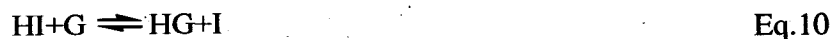

The binding constant for the indicator displacement assay can be expressed as the ratio of the concentrations of products over the concentration of substrates (Eq.11)

$$K = \frac{[\text{HG}][\text{I}]}{[\text{HI}][\text{G}]} \quad \text{Eq.11}$$

The total concentrations of each species give us our mass balance equations for each process (Eq.12, Eq.13, Eq.14).

$$[\text{H}]_T = [\text{H}] + [\text{HG}] + [\text{HI}] \quad \text{Eq.12}$$

$$[\text{G}]_T = [\text{HG}] + [\text{G}] \quad \text{Eq.13}$$

$$[\text{I}]_T = [\text{HI}] + [\text{I}] \quad \text{Eq.14}$$

The following two equilibria occur during this process:

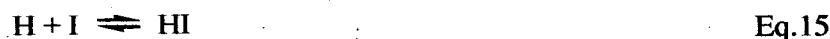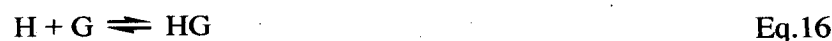

The binding constant for process in Eq.16 can be expressed as ratio of the products over reactants thus affording the binding constant  $K_{\text{HG}}$  as depicted in Eq.2.

$$K_{\text{HG}} = \frac{[\text{HG}]}{[\text{H}][\text{G}]} \quad \text{Eq.2}$$

The absorbance in an indicator displacement assay is again defined by Beer's Law (Eq.17) where  $\epsilon_{\text{HI}}$  and  $\epsilon_{\text{I}}$  are the molar absorptivities of the host:indicator complex and the free indicator respectively,  $b$  is the path length of light through the sample, and  $[\text{HI}]$  and  $[\text{I}]$  are the concentrations of the host:indicator complex and the free indicator respectively.

$$A = \epsilon_{\text{HI}}b[\text{HI}] + \epsilon_{\text{I}}b[\text{I}] \quad \text{Eq.17}$$

Solving equations 13 and 14 for  $[\text{G}]$  and  $[\text{I}]$  respectively and incorporating the solutions into Eq.11 gives Eq.18.

$$K = \frac{[\text{HG}](\text{I}_T - [\text{HI}])}{[\text{HI}]([\text{G}]_T - [\text{HG}])} \quad \text{Eq.18}$$

Solving Eq.18 for [HI] provides Eq. 19.

$$[HI] = \frac{[HG][I]_T}{[HG](1-K) + K[G]_T} \quad \text{Eq.19}$$

Solving equation 12 and 13 for [H] and [G] respectively and substituting into Eq.2 gives Eq.20.

$$K_{HG} = \frac{[HG]}{([H]_T - [HG] - [HI])([G]_T - [HG])} \quad \text{Eq.20}$$

Multiplying each side of Eq.20 by  $([H]_T - [HG] - [HI])([G]_T - [HG])$  and substituting Eq.19 in for the term [HI], provides Eq.21.

$$K_{HG} \left( [H]_T - [HG] - \frac{[HG][I]_T}{[HG](1-K) + K[G]_T} \right) ([G]_T - [HG]) = [HG] \quad \text{Eq.21}$$

Now Eq.21 must be solved for [HG]. The left side of the equation is multiplied by a common denominator for all fractions that gives Eq.22

$$K_{HG} \left( \frac{([H]_T([HG](1-K) + K[G]_T) - [HG]([HG](1-K) + K[G]_T) - [HG][I]_T)}{[HG](1-K) + K[G]_T} \right) ([G]_T - [HG]) = [HG] \quad \text{Eq.22}$$

Multiplying each side of the equation by  $[HG](1-K) + K[G]_T$ , yields Eq.23

$$K_{HG}([H]_T[HG](1-K) + K[H]_T[G]_T - [HG]^2(1-K) - K[HG][G]_T - [HG][I]_T)([G]_T - [HG]) = [HG]([HG](1-K) + K[G]_T) \quad \text{Eq.23}$$

Expanding the terms to the left of the equal sign gives Eq.24.

$$\begin{aligned} & K_{HG}[H]_T[HG][G]_T(1-K) + K_{HG}K[H]_T[G]_T^2 - K_{HG}[G]_T[HG]^2(1-K) - K_{HG}K[HG][G]_T^2 - \\ & K_{HG}[HG][I]_T[G]_T - K_{HG}[H]_T[HG]^2(1-K) - K_{HG}K[H]_T[G]_T[HG] + K_{HG}[HG]^3(1-K) + \\ & KHGK[HG]_2[G]_T + KHG[HG]_2[I]_T \\ & = [HG]^2(1-K) + K[HG][G]_T \end{aligned} \quad \text{Eq.24}$$

Setting the equation equal to zero and combining like terms now provides the cubic in Eq.25

$$\begin{aligned} & K_{HG}(1-K)[HG]^3 + \\ & (K_{HG}K[G]_T + K_{HG}[I]_T(1-K) - K_{HG}[G]_T(1-K) - K_{HG}[H]_T(1-K))[HG]^2 + \\ & (K_{HG}[H]_T[G]_T(1-K) - K_{HG}K[G]_T^2 + K_{HG}[I]_T[G]_T - K_{HG}K[H]_T[G]_T - K[G]_T)[HG] + \\ & K_{HG}K[H]_T[G]_T^2 = 0 \end{aligned} \quad \text{Eq.25}$$

Then, we solve the cubic equation by the method of Viète.

$$[HG]_1 = \text{Temp} \cdot \cos(\Phi/3) - S/3T$$

$$[HG]_2 = -\text{Temp} \cdot \cos((\Phi + \pi)/3) - S/3T$$

$$[HG]_3 = -\text{Temp} \cdot \cos((\Phi - \pi)/3) - S/3T$$

if

$$\left(\frac{Q^2}{4} + \frac{P^3}{27}\right) < 0$$

where

$$T = K_{HG}(1-K)$$

$$S = (K_{HG}K[G]_T + K_{HG}[I]_T - (1-K) - K_{HG}[G]_T(1-K) - K_{HG}[H]_T(1-K))$$

$$F = (K_{HG}[H]_T[G]_T(1-K) - K_{HG}K[G]_T^2 + K_{HG}[I]_T[G]_T - K_{HG}K[H]_T[G]_T - K[G]_T)$$

$$N = K_{HG}K[H]_T[G]_T^2$$

$$P = \frac{\left(3\left(\frac{F}{T}\right) - \left(\frac{S}{T}\right)^2\right)}{3}$$

$$Q = \frac{\left(2\left(\frac{S}{T}\right)^3 - 9\left(\frac{S \cdot F}{T^2}\right) + \frac{27N}{T}\right)}{27}$$

$$\Phi = \arccos \left[ \frac{-0.5 Q}{\sqrt{(P^3/27)}} \right]$$

$$\text{Temp} = 2\sqrt{\frac{P}{3}}$$
